# Supplementary material for: Histopathological, immunohistochemical, and ultrastructural evidence of spontaneous Senecavirus A-induced lesions at the choroid plexus of newborn piglets
Source: PubMed Central journal article supplement (PMC5707367; doi:10.1038/s41598-017-16407-0), 2017-11-29

**Histopathological, immunohistochemical, and ultrastructural evidence of spontaneous *Senecavirus A*-induced lesions at the choroid plexus of newborn piglets**

Thalita E. S. Oliveira<sup>‡,€</sup>, Mariana M. Z. Michelazzo<sup>‡</sup>, Thiago Fernandes<sup>‡</sup>,

Admilton G. De Oliveira<sup>‡,£</sup>, Raquel A. Leme<sup>¥,§</sup>, Alice F. Alfieri<sup>¥,§</sup>,

Amauri A. Alfieri<sup>¥,§</sup>, Selwyn A. Headley<sup>‡,€</sup>

Supplemental Figure 1. Distribution of the age of piglets that died with clinical manifestations of Epidemic Transient Neonatal Losses. The period of intense viremia was between 2 and 5 days of life, as demonstrated in experimental studies<sup>1</sup> (Joshi et al. 2016)

1. Joshi, L. R. *et al.* Pathogenesis of *Senecavirus A* infection in finishing pigs. *J Gen Virol* **97**, 3267-3279 (2016).

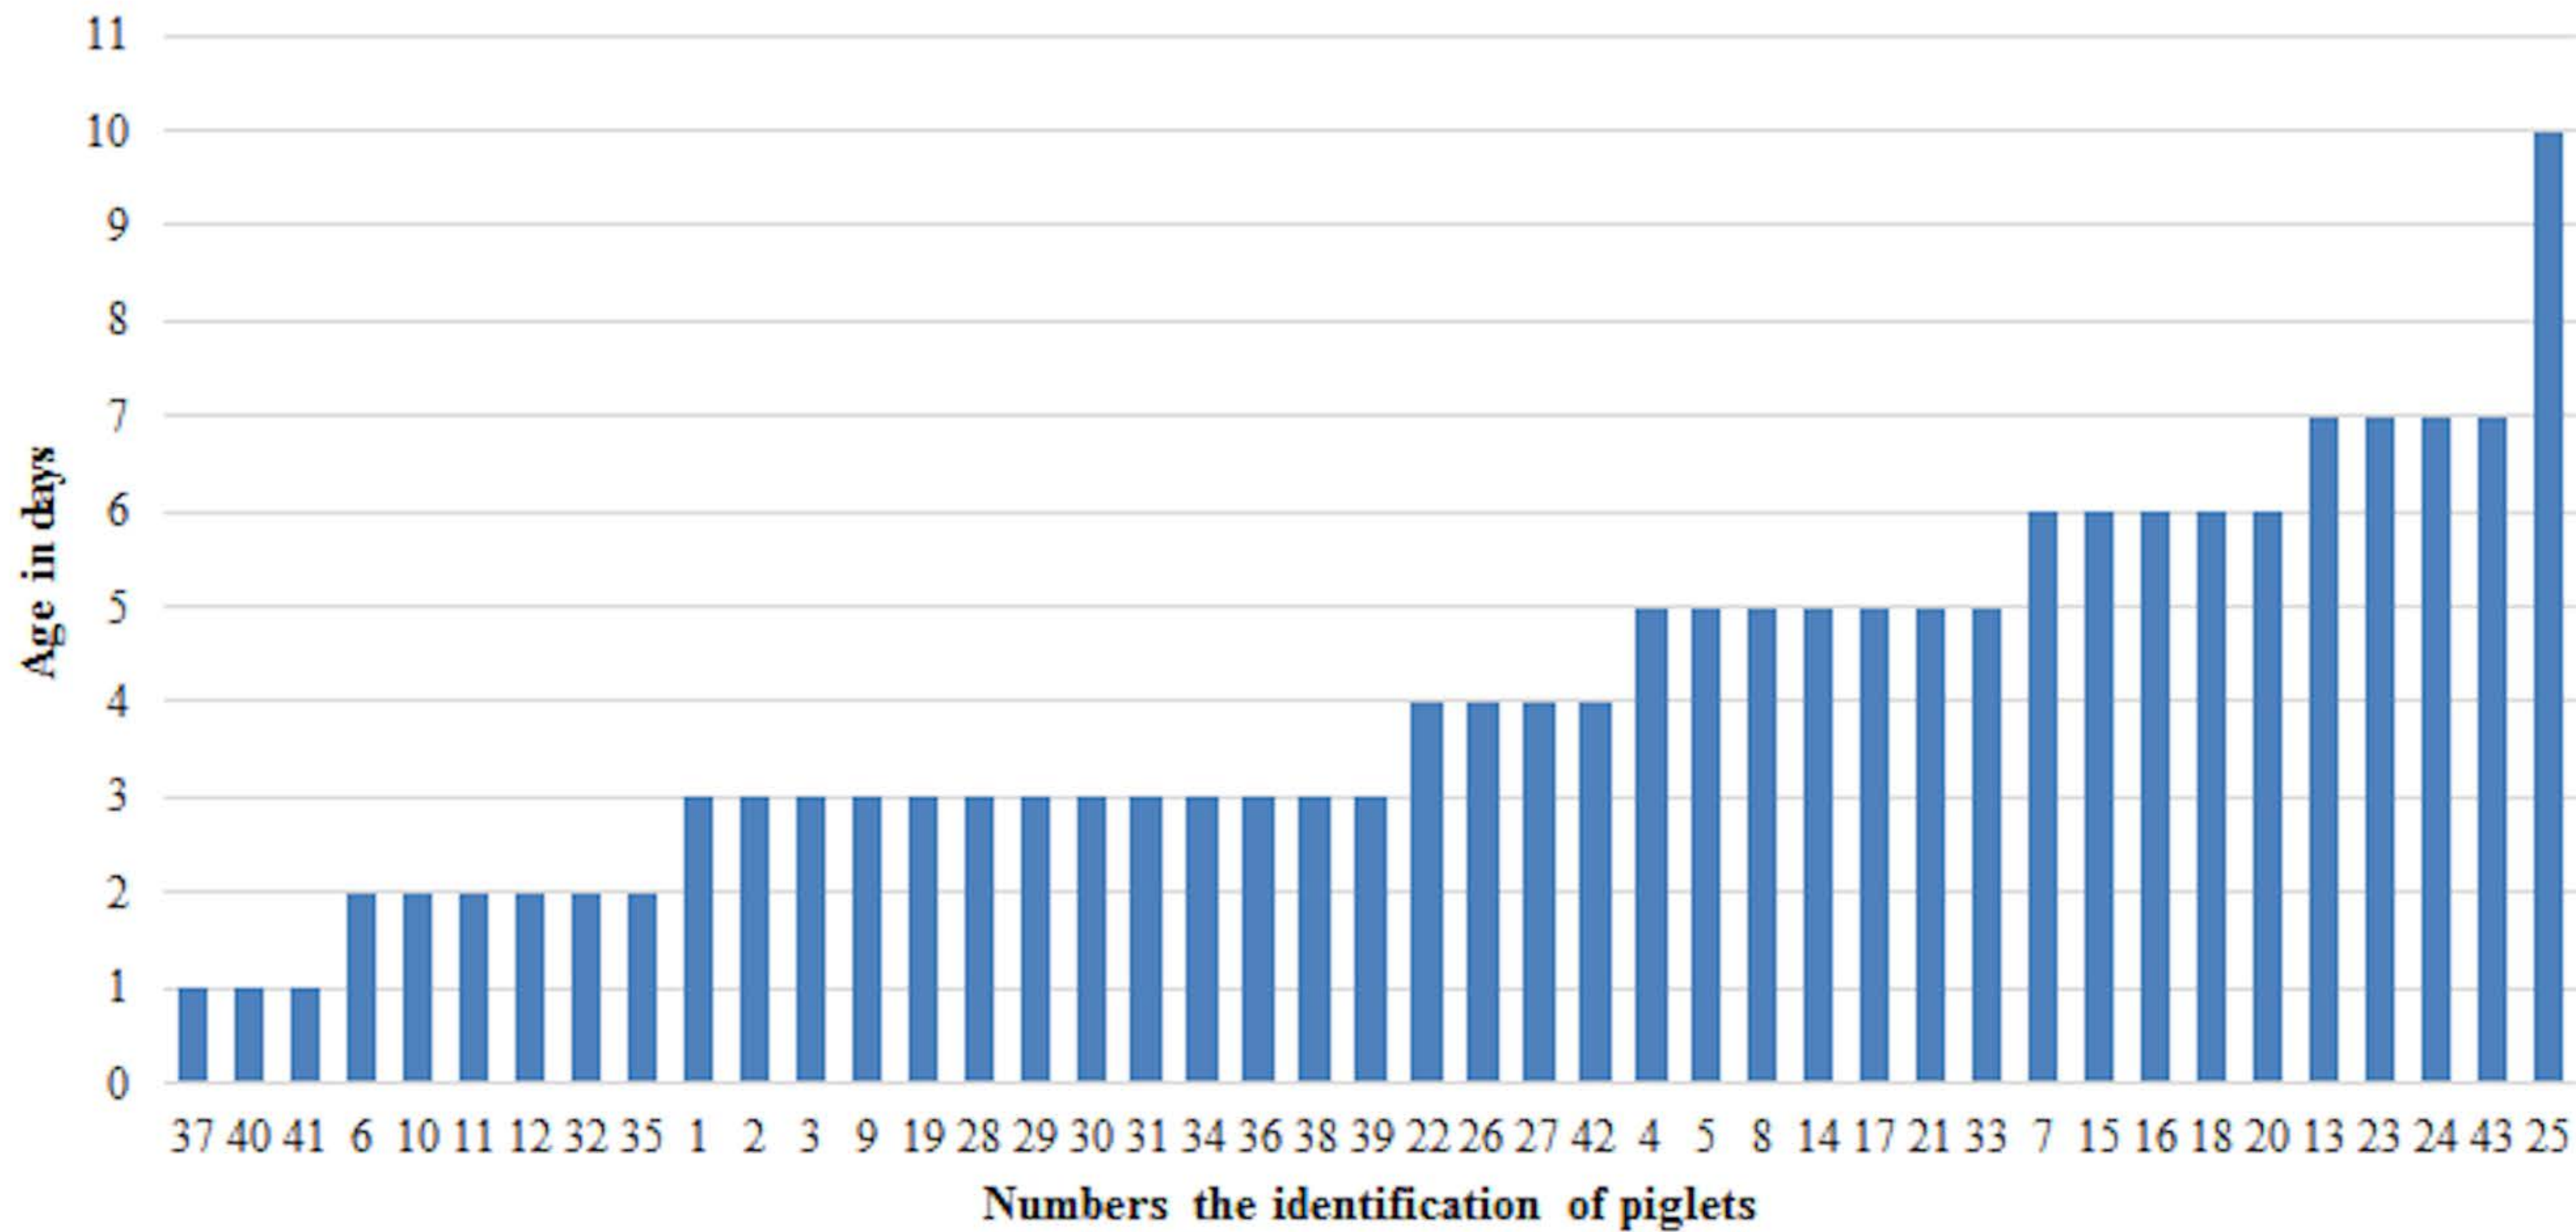

Supplement: 41598_2017_16407_MOESM1_ESM.pdf [file 41598_2017_16407_MOESM1_ESM.pdf]
